# Supplementary material for: The Effect of Ganoderma Microsporum immunomodulatory proteins on alleviating PM2.5-induced inflammatory responses in pregnant rats and fine particulate matter-induced neurological damage in the offsprings
Source: PubMed Central journal article supplement (PMC6497649; doi:10.1038/s41598-019-38810-5), 2019-05-02

**The Effect of *Ganoderma Microsporium* immunomodulatory proteins on alleviating PM<sub>2.5</sub>-induced inflammatory responses in pregnant rats and fine particulate matter-induced neurological damage in the offsprings**

Chia-Yi Tseng<sup>1,2,†</sup>, Jia-Yu Yu<sup>3,†</sup>, Yu-Chen Chuang<sup>1</sup>, Chia-Ying Lin<sup>1</sup>, Chun-Hao Wu<sup>1</sup>, Chia-Wei Liao<sup>1</sup>, Fu-Hua Yang<sup>1</sup>, Ming-Wei Chao<sup>2,3,\*</sup>

<sup>1</sup>Department of Biomedical Engineering, <sup>2</sup> Department of Bioscience Technology, <sup>3</sup>Center for Nanotechnology, Chung Yuan Christian University, Zhongli district, Taoyuan, Taiwan 320; Chung Yuan Christian University, Zhongli district, Taoyuan, Taiwan 32023

\*Correspondence author to MWC at Department of Bioscience Technology, College of Science, Chung Yuan Christian University, 200 Chung Pei Road, Zhongli district, Taoyuan city, Taiwan 32023; Tel: 886-3-265-3512; Fax: 886-3-265-3599; Email: [chao@cycu.edu.tw](mailto:chao@cycu.edu.tw)

† Authors contributed equally to the work.

Running title: GMI mitigates PM<sub>2.5</sub>-induced inflammatory and neurological damages

Supplementary Figure 1. Raw data of western blot result for cortex and hippocampus.

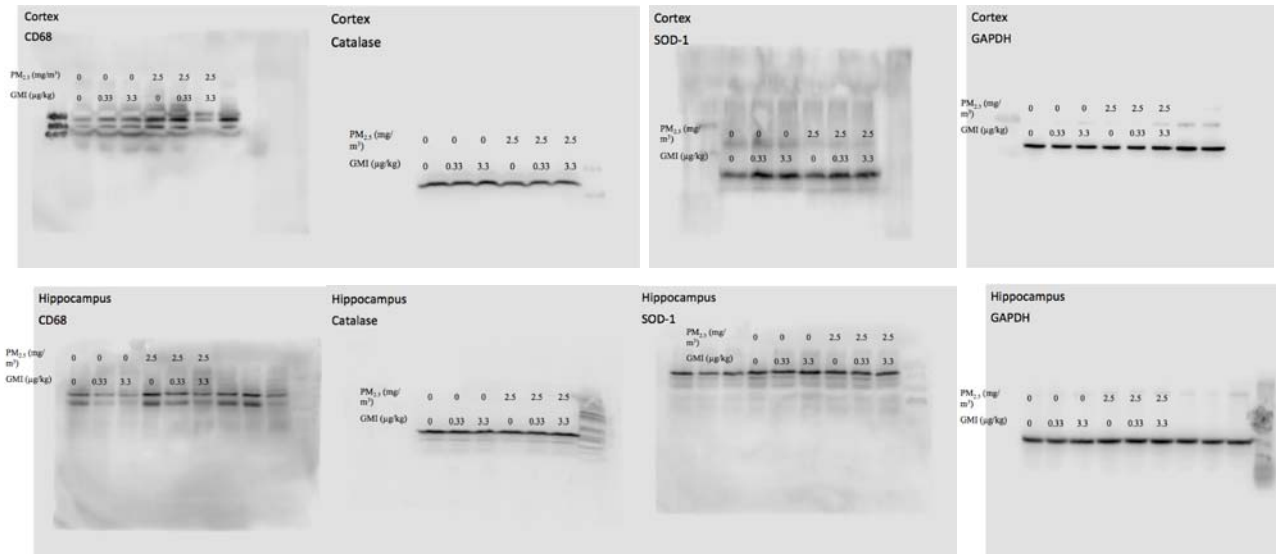

Supplement: 41598_2019_38810_MOESM1_ESM.pdf [file 41598_2019_38810_MOESM1_ESM.pdf]
